# Supplementary material for: A case of autosomal dominant osteopetrosis type II with a severe bone phenotype but no amino acid converting mutation in the CLCN7 gene
Source: bioRxiv or medRxiv preprint supplement (doi:10.1101/2021.07.08.21257202), 2021-07-10
Supplement: Supplementary file [file media-1.pdf]

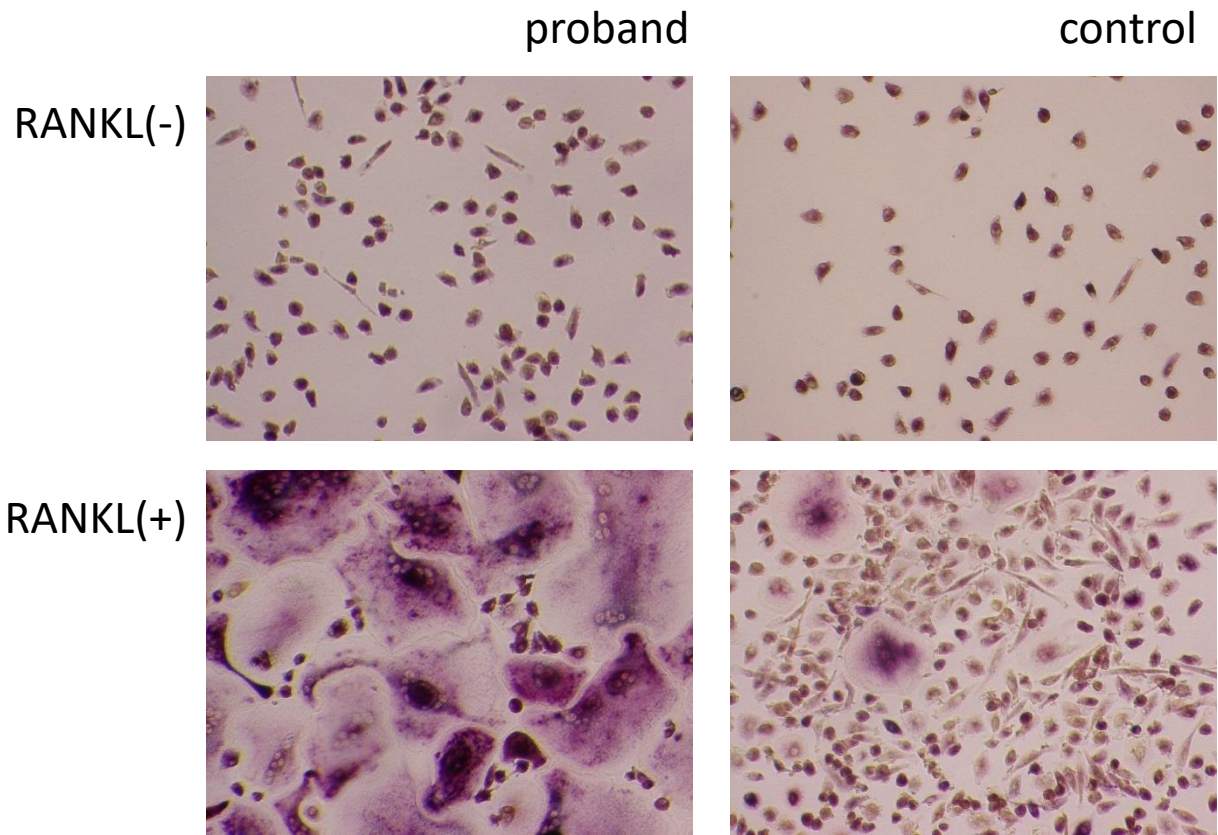

**Supplementary Fig. S1:** Circulating monocytes from the proband can differentiate into large TRAP-positive multinucleated osteoclast-like cells. Cells incubated for 4 days in the presence or absence of rhRANKL are shown, stained histochemically for TRAP.
